# Supplementary material for: Vestibular Compensation after Vestibular Dysfunction Induced by Arsanilic Acid in Mice
Source: PubMed Central journal article supplement (PMC6896078; doi:10.3390/brainsci9110329), 2019-11-18
Supplement: brainsci-09-00329-s001.pdf [file brainsci-09-00329-s001.pdf]

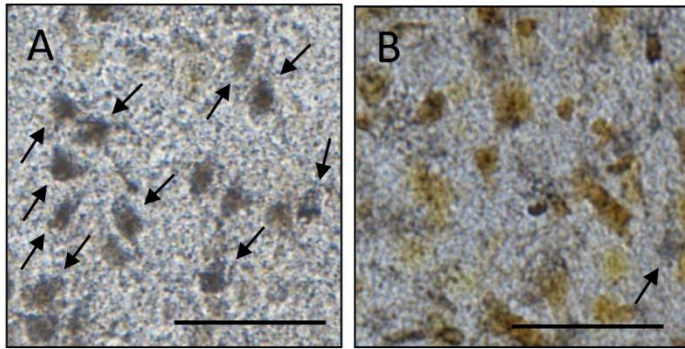

**Figure S1: Silver staining of positive control tissues and the vestibular ganglion after unilateral labyrinthectomy with arsanilic acid in mice**

(A) Positive control tissues provided with the staining kit. (B) Vestibular ganglion stained at 30 days after surgery.

Black-stained cells (arrows) can be seen in the positive control tissues (A). There are few black-stained cells in the vestibular ganglion (B).

Scale bar, 20  $\mu\text{m}$

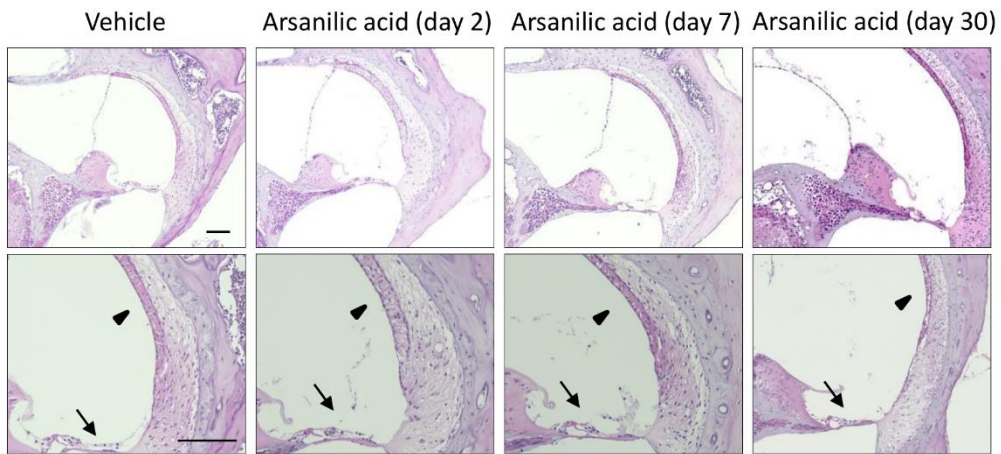

**Figure S2: Histology of the cochlea after unilateral labyrinthectomy with arsanilic acid in mice (hematoxylin–eosin staining)**

There is no significant damage to the hair cells in the cochlea (arrows) or to the stria vascularis (arrow heads).

Scale bar, 20  $\mu\text{m}$

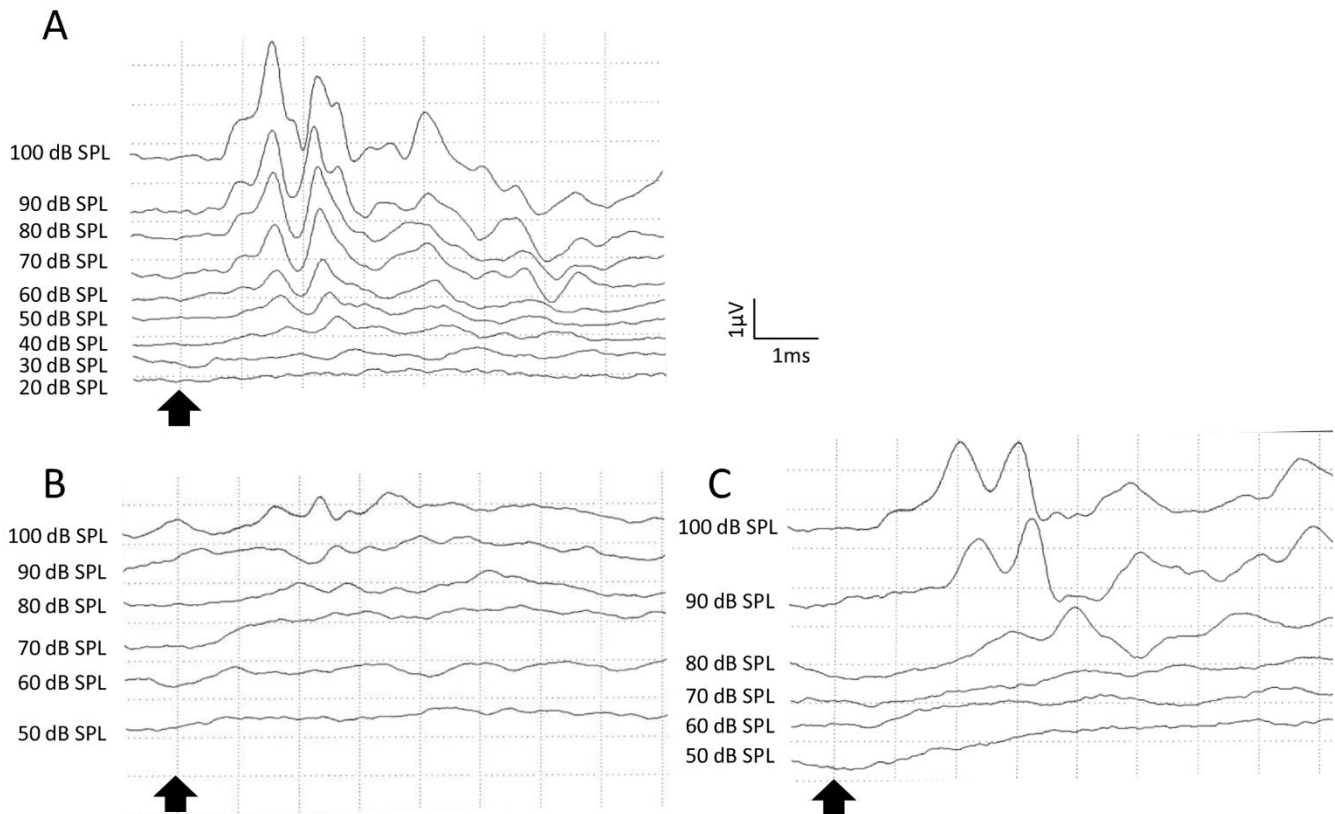

**Figure S3: Auditory brain stem response (ABR) at 32kHz**

A: intact group, B: arsanilic acid group, C: vehicle group

The thresholds of ABRs were successfully recorded among all groups: intact, arsanilic acid and vehicle group. The ABR threshold (wave I) in intact group was 30 dB. The thresholds were elevated by 30 – 40 dB on all conditions in both arsanilic acid and vehicle group, compared with intact group. There were no threshold shifts in the contralateral ears in both groups (data not shown).

Black arrows: triggers.

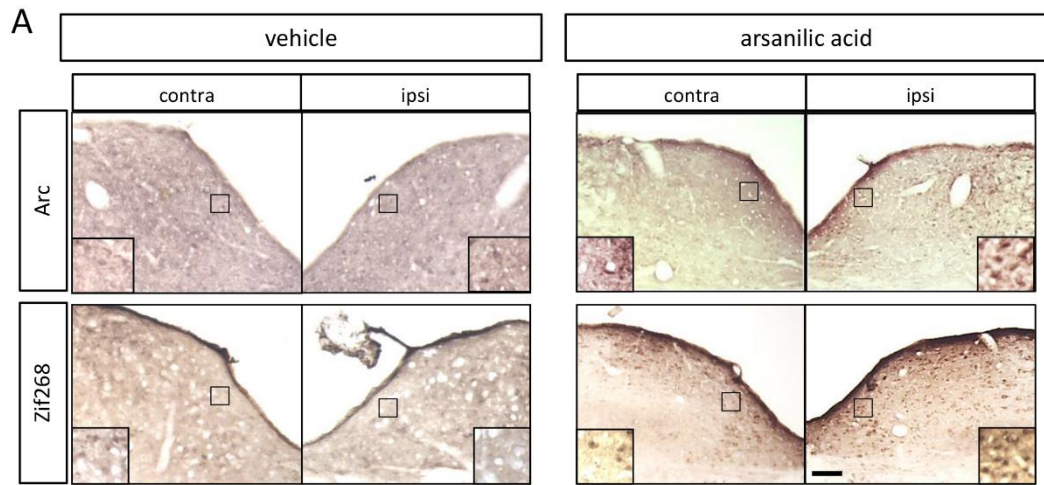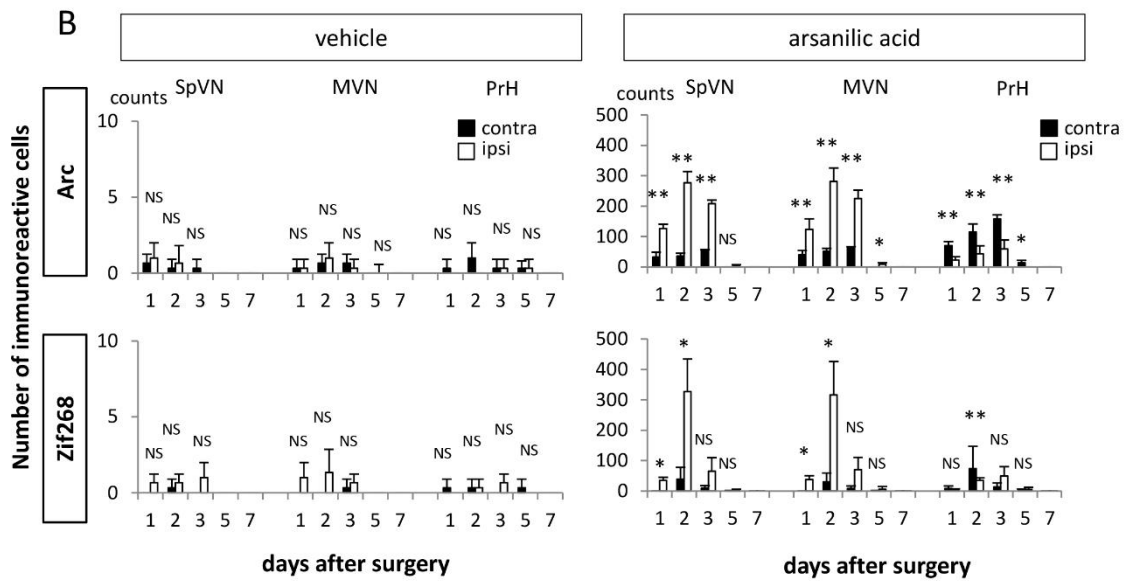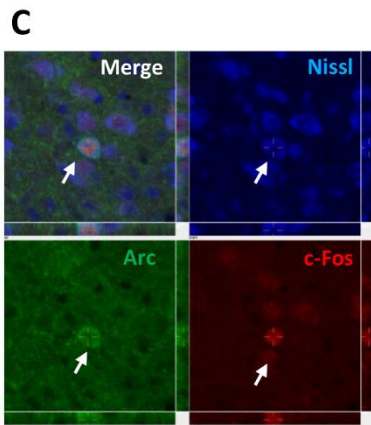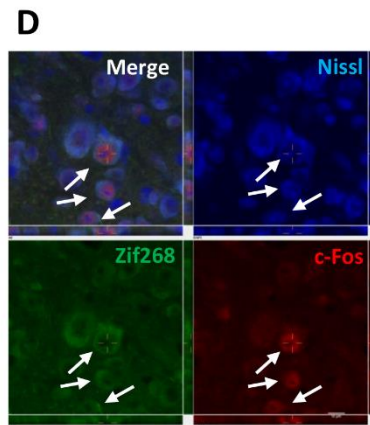

**Figure S4: Expression of Arc-IR and Zif268-IR cells in the vestibular nucleus and immunofluorescence double-labeling (c-Fos/Arc/Zif268)**

(A) Expression of Arc-IR/Zif268-IR cells in the vestibular nucleus. (B) Number of Arc-IR/Zif268-IR cells. (C) Immunofluorescence double-labeling (c-Fos/Arc). (D) Immunofluorescence double-labeling (c-Fos/Zif268).

There are a few Arc-IR/Zif 268-IR cells in the SpVN, MVN, and PrHN in the vehicle (unilateral labyrinthectomy with phosphate buffer) group (A, B).

In the ipsilateral and contralateral SpVN/MVN/PrH in the arsanilic acid (unilateral labyrinthectomy with arsanilic acid) group, a substantial number of Arc-IR and Zif268-IR cells can be observed on day 1 after surgery, with a maximum increase in number at 2 days and a gradual decrease to zero by 7 days (A, B). This is similar to the pattern of expression of c-Fos-IR cells. The panels in C show the colocalization of c-Fos-IR (red) and Arc-IR (green) cells in the ipsilateral SpVN in the arsanilic acid group. The panels in D show the colocalization of c-Fos-IR (red) and Zif268-IR (green) cells in the ipsilateral MVN. The arrows indicate double-staining cells.

\* $p < 0.05$ , \*\* $p < 0.01$

NS, not significant; one-way analysis of variance (ipsilateral vs. contralateral)
